# Supplementary material for: Boron-based Be2B5+/0/−alloy clusters: inverse sandwiches with pentagonal boron ring and reduction-induced structural transformation to molecular wheel structure
Source: Royal Society of Chemistry journal article supplement (doi:10.1039/d0nj05961g), 2021-01-01

Electronic Supplementary Material (ESI) for New Journal of Chemistry.

This journal is © The Royal Society of Chemistry and the Centre National de la Recherche Scientifique 2020

## SUPPLEMENTARY INFORMATION

### Boron-Based $\text{Be}_2\text{B}_5^{+/0/-}$ Alloy Clusters: Inverse Sandwiches with a Pentagonal Boron Ring and Reduction-Induced Structural Transformation to Molecular Wheel

Li-Hua Han,<sup>a</sup> Ying-Jin Wang,<sup>\*ab</sup> and Hua-Jin Zhai<sup>\*a</sup>

<sup>a</sup>*Nanocluster Laboratory, Institute of Molecular Science, Shanxi University, Taiyuan 030006, China*

<sup>b</sup>*Department of Chemistry, Xinzhou Teachers University, Xinzhou 034000, Shanxi, China*

\*E-mail: yingjinwang@sxu.edu.cn (Y.-J.W.); hj.zhai@sxu.edu.cn (H.-J.Z.)

**Table S1.** Cartesian coordinates for the global-minimum (GM) structures of  $\text{Be}_2\text{B}_5^{+/0/-}$  clusters at the PBE0/6-311+G\* level.

**Figure S1.** Alternative optimized low-lying structures of cationic  $\text{Be}_2\text{B}_5^+$  cluster. Relative energies are shown in square brackets at the PBE0/6-311+G\* level with corrections for zero-point energies (ZPEs). Also shown are relative energies for top five isomers at the single-point CCSD(T)/6-311+G\*//PBE0/6-311+G\* level, including the ZPE corrections at PBE0. All energies are in eV. For the CCSD(T) calculations, all T1 diagnostic values are 0.020–0.028, which are normal relative to the recommended threshold value (~0.02).

**Figure S2.** Same as Figure S1, except for neutral  $\text{Be}_2\text{B}_5$  cluster. For the single-point CCSD(T) calculations, the T1 diagnostic values of the 3<sup>rd</sup> and 4<sup>th</sup> isomers (marked with an asterisk) are 0.053 and 0.048, respectively, which are abnormal with respect to the recommended threshold value ( $\sim 0.02$ ). Nevertheless, all CCSD(T) energies appear to be closely consistent with those at PBE0. We consider that the CCSD(T) data are valid for this system.

**Figure S3.** Same as Figure S1, except for anion  $\text{Be}_2\text{B}_5^-$  cluster. For the single-point CCSD(T) calculations, the T1 diagnostic value of the 5<sup>th</sup> isomer (marked with an asterisk) amounts to 0.056, which is abnormal relative to the recommended threshold value ( $\sim 0.02$ ), generating a relative energy that is highly inconsistent with the PBE0 trend. This specific CCSD(T) number should not be trusted. In contrast, the T1 values of the 1<sup>st</sup> to 4<sup>th</sup> isomers are normal. Overall, the 1<sup>st</sup> isomer is tentatively assigned to be the lowest in energy, according to the CCSD(T) calculations.

**Figure S4.** Calculated Wiberg bond indices (WBIs; in black color) and natural atomic charges (in  $|e|$ ; red color) from natural bond orbital (NBO) analyses at the PBE0/6-311G\* level. (a) Cationic  $\text{Be}_2\text{B}_5^+$  (**1**,  $D_{5h}$ ,  $^1A_1'$ ) cluster. (b) Neutral  $\text{Be}_2\text{B}_5$  (**2**,  $C_{2v}$ ,  $^2A_1$ ) cluster. (c) Anion  $\text{Be}_2\text{B}_5^-$  (**3**,  $C_s$ ,  $^1A'$ ) cluster.

**Figure S5.** The pictures for occupied canonical molecular orbitals (CMOs) of neutral  $\text{Be}_2\text{B}_5$  (**2**,  $C_{2v}$ ,  $^2A_1$ ) cluster, which differs from cationic  $\text{Be}_2\text{B}_5^+$  (**1**,  $D_{5h}$ ,  $^1A_1'$ ) cluster by one more electron in the singly occupied molecular orbital (SOMO). (a) Five  $\sigma$  CMOs for peripheral two-center two-electron (2c-2e) B–B  $\sigma$  single bonds. (b) The  $\pi$  sextet. (c) Two delocalized  $\sigma$  CMOs within the  $\text{B}_5$  ring.

**Table S1.** Cartesian coordinates for the global-minimum (GM) structures of  $\text{Be}_2\text{B}_5^{+0/-}$  clusters at the PBE0/6-311+G\* level.

(a)  $\text{Be}_2\text{B}_5^+$  (**1**,  $D_{5h}$ ,  $^1A_1'$ )

|    |             |             |             |
|----|-------------|-------------|-------------|
| B  | 0.00000000  | 1.34052500  | 0.00000000  |
| B  | 1.27491500  | 0.41424500  | 0.00000000  |
| B  | 0.78794100  | -1.08450700 | 0.00000000  |
| B  | -0.78794100 | -1.08450700 | 0.00000000  |
| B  | -1.27491500 | 0.41424500  | 0.00000000  |
| Be | 0.00000000  | 0.00000000  | 1.33493100  |
| Be | 0.00000000  | 0.00000000  | -1.33493100 |

(b)  $\text{Be}_2\text{B}_5$  (**2**,  $C_{2v}$ ,  $^2A_1$ )

|    |             |             |             |
|----|-------------|-------------|-------------|
| B  | 0.00000000  | 1.17658600  | 0.41172700  |
| B  | 0.00000000  | 0.00000000  | 1.52238000  |
| B  | 0.00000000  | -1.17658600 | 0.41172700  |
| B  | 0.00000000  | -0.77787800 | -1.14899000 |
| B  | 0.00000000  | 0.77787800  | -1.14899000 |
| Be | -1.29067200 | 0.00000000  | -0.02990900 |
| Be | 1.29067200  | 0.00000000  | -0.02990900 |

(c)  $\text{Be}_2\text{B}_5^-$  (**3**,  $C_s$ ,  $^1A'$ )

|   |             |             |            |
|---|-------------|-------------|------------|
| B | -0.24075000 | 0.04496200  | 0.00000000 |
| B | 0.05706300  | -1.58844100 | 0.00000000 |

|    |            |             |             |
|----|------------|-------------|-------------|
| B  | 0.03584700 | -0.85763900 | 1.41800300  |
| B  | 0.05463800 | 1.76913300  | 0.00000000  |
| B  | 0.03584700 | -0.85763900 | -1.41800300 |
| Be | 0.03584700 | 0.93101600  | -1.62738100 |
| Be | 0.03584700 | 0.93101600  | 1.62738100  |

**Figure S1.** Alternative optimized low-lying structures of cationic  $\text{Be}_2\text{B}_5^+$  cluster. Relative energies are shown in square brackets at the PBE0/6-311+G\* level with corrections for zero-point energies (ZPEs). Also shown are relative energies for top five isomers at the single-point CCSD(T)/6-311+G\*\*/PBE0/6-311+G\* level, including the ZPE corrections at PBE0. All energies are in eV. For the CCSD(T) calculations, all T1 diagnostic values are 0.020–0.028, which are normal relative to the recommended threshold value ( $\sim 0.02$ ).

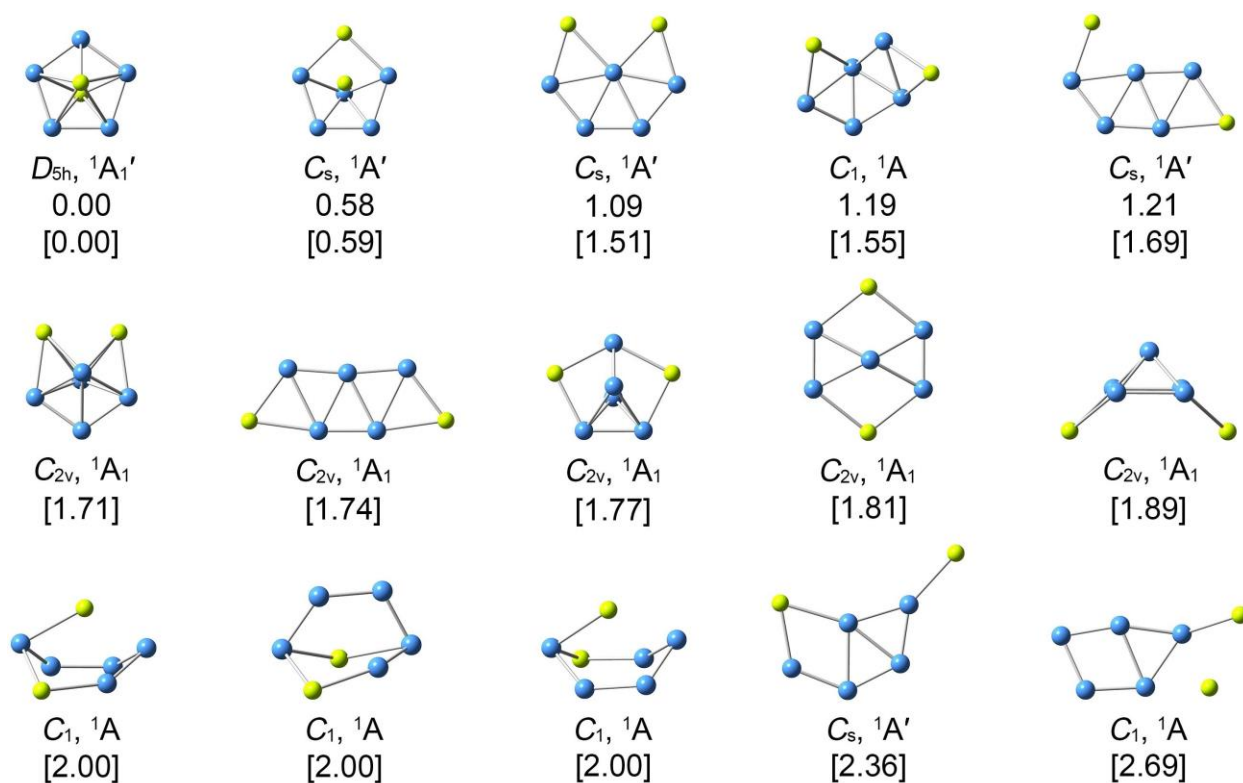

**Figure S2.** Same as Figure S1, except for neutral Be<sub>2</sub>B<sub>5</sub> cluster. For the single-point CCSD(T) calculations, the T1 diagnostic values of the 3<sup>rd</sup> and 4<sup>th</sup> isomers (marked with an asterisk) are 0.053 and 0.048, respectively, which are abnormal with respect to the recommended threshold value (~0.02). Nevertheless, all CCSD(T) energies appear to be closely consistent with those at PBE0. We consider that the CCSD(T) data are valid for this system.

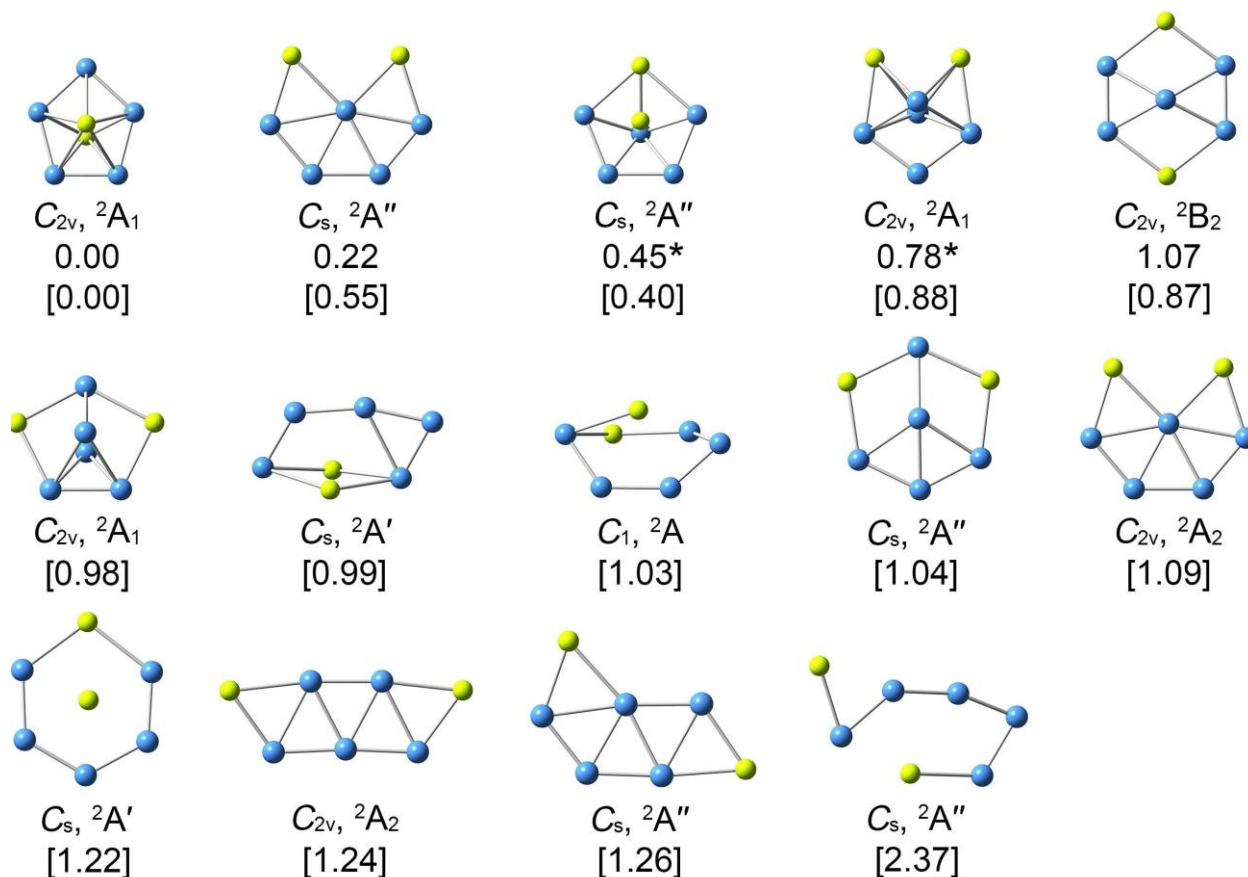

**Figure S3.** Same as Figure S1, except for anion  $\text{Be}_2\text{B}_5^-$  cluster. For the single-point CCSD(T) calculations, the T1 diagnostic value of the 5<sup>th</sup> isomer (marked with an asterisk) amounts to 0.056, which is abnormal relative to the recommended threshold value ( $\sim 0.02$ ), generating a relative energy that is highly inconsistent with the PBE0 trend. This specific CCSD(T) number should not be trusted. In contrast, the T1 values of the 1<sup>st</sup> to 4<sup>th</sup> isomers are normal. Overall, the 1<sup>st</sup> isomer is tentatively assigned to be the lowest in energy, according to the CCSD(T) calculations.

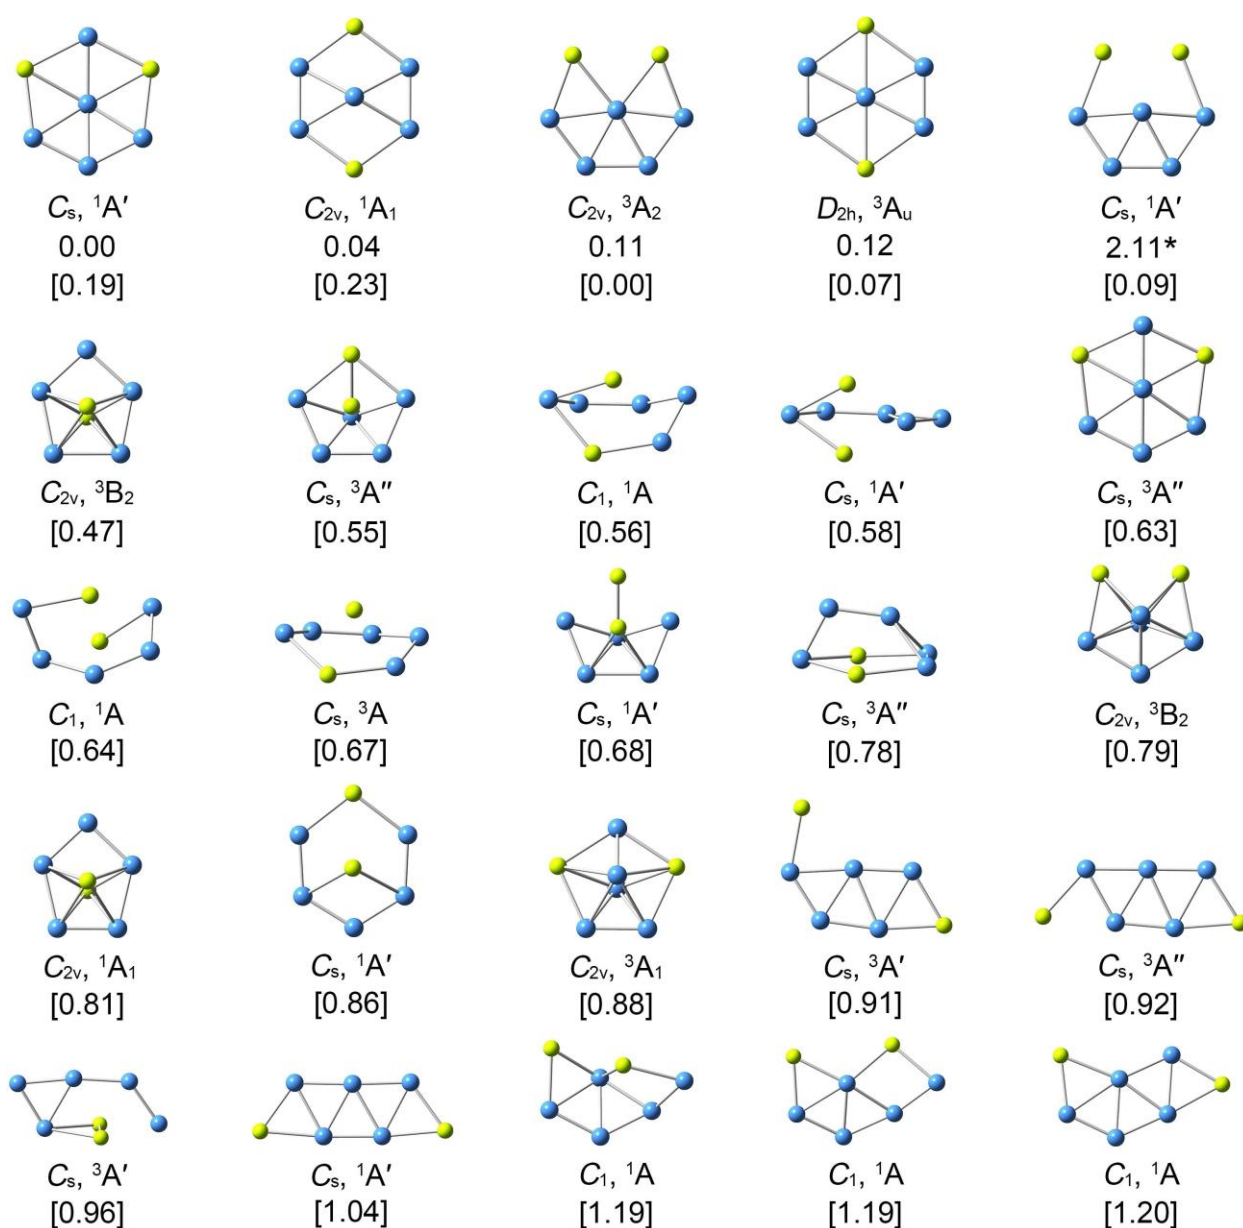

**Figure S4.** Calculated Wiberg bond indices (WBIs; in black color) and natural atomic charges (in |e|; red color) from natural bond orbital (NBO) analyses at the PBE0/6-311G\* level. (a) Cationic  $\text{Be}_2\text{B}_5^+$  (**1**,  $D_{5h}$ ,  $^1A_1'$ ) cluster. (b) Neutral  $\text{Be}_2\text{B}_5$  (**2**,  $C_{2v}$ ,  $^2A_1$ ) cluster. (c) Anion  $\text{Be}_2\text{B}_5^-$  (**3**,  $C_s$ ,  $^1A'$ ) cluster.

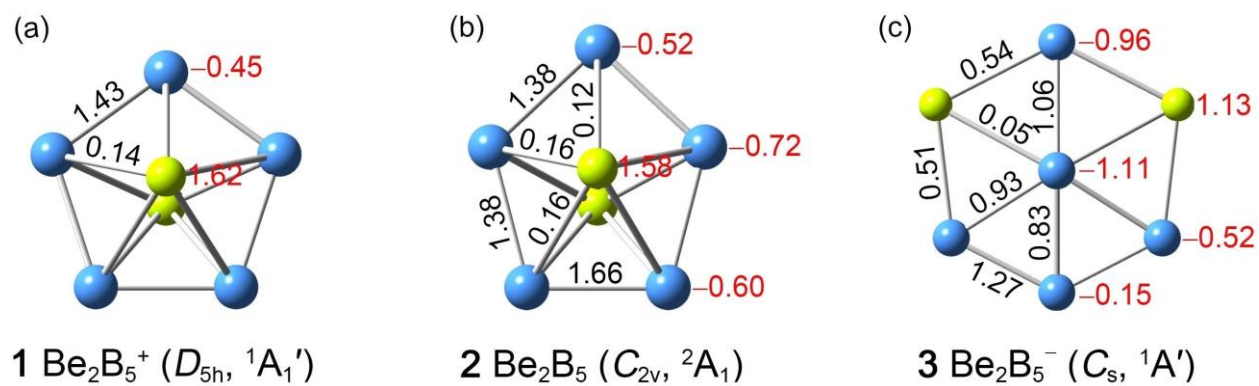



**Figure S5.** The pictures for occupied canonical molecular orbitals (CMOs) of neutral  $\text{Be}_2\text{B}_5$  (**2**,  $C_{2v}$ ,  $^2A_1$ ) cluster, which differs from cationic  $\text{Be}_2\text{B}_5^+$  (**1**,  $D_{5h}$ ,  $^1A_1'$ ) cluster by one more electron in the singly occupied molecular orbital (SOMO). (a) Five  $\sigma$  CMOs for peripheral two-center two-electron (2c-2e) B–B  $\sigma$  single bonds. (b) The  $\pi$  sextet. (c) Two delocalized  $\sigma$  CMOs within the  $\text{B}_5$  ring.

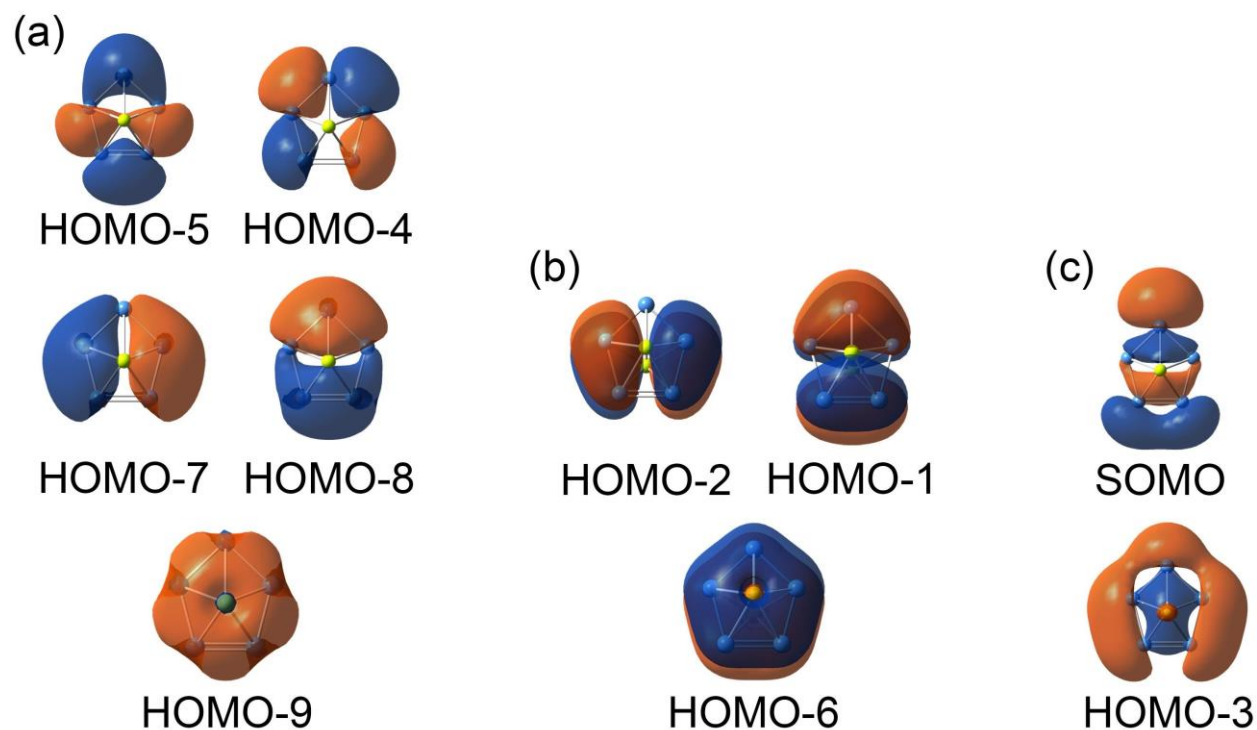

Supplement: d0nj05961g1.pdf [file d0nj05961g1.pdf]
